# Supplementary material for: Internal standard evaluation for bioimaging soybean leaves through laser ablation inductively coupled plasma mass spectrometry: a plant nanotechnology approach
Source: Royal Society of Chemistry journal article supplement (doi:10.1039/c8ja00254a), 2018-01-01
Supplement: c8ja00254a1.pdf [file c8ja00254a1.pdf]

### Electronic Supplementary Information

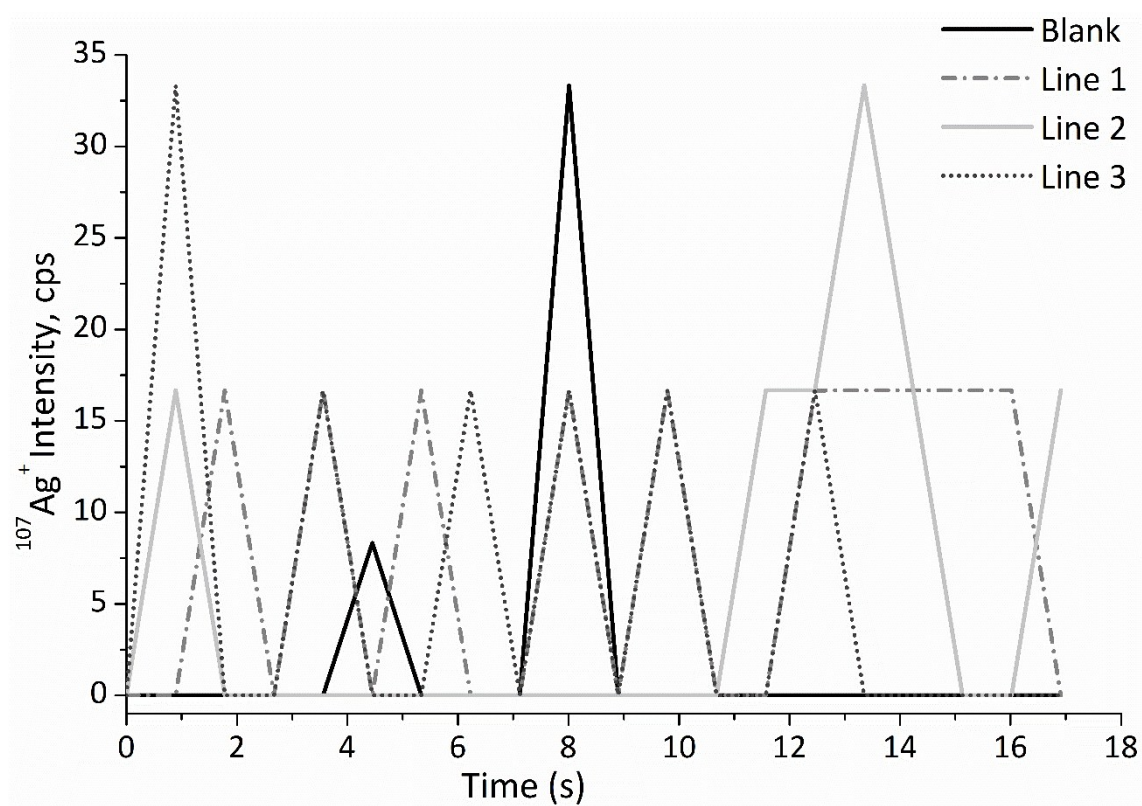

**ESI.1** Signals of  $^{107}\text{Ag}$  obtained at different ablation lines (1-3), compared to blank signals (Blank – bold lines)
